# Supplementary material
Source: PubMed Central journal article supplement (PMC7794171)
Supplement: ONCO-26-e66-s001.pdf [file ONCO-26-e66-s001.pdf]

Supplemental Tables for:  
The impact of the COVID-19 pandemic on surgical management of breast cancer: global trends and future perspectives.  
Nicola Rocco et al.

**Table S1. American College of Surgeons: COVID-19 Elective case triage guidelines for surgical care of breast cancer (7).**

**ICU Intensive Care Unit**

| Phase                                            | Description                                                                                                                                                                                                                            |
|--------------------------------------------------|----------------------------------------------------------------------------------------------------------------------------------------------------------------------------------------------------------------------------------------|
| Phase I. Semi-Urgent Setting (Preparation Phase) | <ul style="list-style-type: none"> <li>• Few COVID 19 patients</li> <li>• hospital resources not exhausted</li> <li>• institution still has ICU vent capacity</li> <li>• and COVID trajectory not in rapid escalation phase</li> </ul> |
| Phase II. Urgent setting                         | <ul style="list-style-type: none"> <li>• Many COVID 19 patients</li> <li>• ICU and ventilator capacity limited, or</li> <li>• supplies limited or</li> <li>• COVID trajectory within hospital in rapidly escalating phase</li> </ul>   |
| Phase III                                        | <ul style="list-style-type: none"> <li>• Hospital resources are all routed to COVID 19 patients,</li> <li>• no ventilator or ICU capacity, or</li> <li>• supplies exhausted.</li> </ul>                                                |

Table S2. Web-based poll questions

|   | Question                          | Possible answers                                                                                                                                                                                                                                                                                                                                                                                                                                                          |
|---|-----------------------------------|---------------------------------------------------------------------------------------------------------------------------------------------------------------------------------------------------------------------------------------------------------------------------------------------------------------------------------------------------------------------------------------------------------------------------------------------------------------------------|
| 1 | <b>Geographical area</b>          | <ol style="list-style-type: none"> <li>1. North America</li> <li>2. Central America</li> <li>3. South America</li> <li>4. USA</li> <li>5. Middle East</li> <li>6. Iran</li> <li>7. Italy</li> <li>8. Spain- France-UK</li> <li>9. Oceania</li> <li>10. Other</li> </ol>                                                                                                                                                                                                   |
| 2 | <b>Position</b>                   | <ol style="list-style-type: none"> <li>1. Fully accredited surgeons</li> <li>2. Trainees</li> </ol>                                                                                                                                                                                                                                                                                                                                                                       |
| 3 | <b>Pandemic phase</b>             | <ol style="list-style-type: none"> <li>1. Phase 1</li> <li>2. Phase 2</li> <li>3. Phase 3</li> </ol>                                                                                                                                                                                                                                                                                                                                                                      |
| 4 | <b>Surgical Priorities</b>        | <ol style="list-style-type: none"> <li>1. Neoadjuvant patients finishing treatment; T2 or N1 HR+/HER2 neg; Triple negative or HER2 positive ; Discordant biopsies likely to be malignant Excision of malignant recurrence</li> <li>2. Like the previous but no Discordant biopsies likely to be malignant</li> <li>3. Neoadjuvant patients finishing treatment; Triple negative or HER2 positive patients</li> <li>4. Neoadjuvant patients finishing treatment</li> </ol> |
| 5 | <b>Cases that can be deferred</b> | <ol style="list-style-type: none"> <li>1. I'm not changing my practice</li> <li>2. I'm deferring bilateral procedures and autologous reconstructions and benign cases</li> <li>3. Like the previous but also ER+ DCIS</li> <li>4. Like the previous but also Re-excision surgery</li> </ol>                                                                                                                                                                               |

|   |                                                                                                                        |                                                                                                                                                                                                                                                                                                                                                                                                                                                                                                                                                                                                                                                                                                                           |
|---|------------------------------------------------------------------------------------------------------------------------|---------------------------------------------------------------------------------------------------------------------------------------------------------------------------------------------------------------------------------------------------------------------------------------------------------------------------------------------------------------------------------------------------------------------------------------------------------------------------------------------------------------------------------------------------------------------------------------------------------------------------------------------------------------------------------------------------------------------------|
| 6 | <b>Alternative treatment approaches to be considered including use primary systemic therapies (chemo and hormonal)</b> | <p>1. I'm not changing indications for primary systemic therapies</p> <p>2. T1N0 HR+/Her2 neg; tumors can receive hormonal therapy; Triple negative and HER2 positive tumors can undergo neoadjuvant therapy prior to surgery; some T2 or N1 HR+/HER2 negative tumors can receive hormonal therapy; N1 irrespective of subtype can undergo neoadjuvant therapy</p> <p>3. Triple negative and HER2 positive tumors can undergo neoadjuvant therapy prior to surgery; N1 irrespective of subtype can undergo neoadjuvant therapy prior to surgery</p> <p>4. Triple negative and HER2 positive tumors can undergo neoadjuvant therapy prior to surgery. I use endocrine treatment in elderly patients with comorbidities</p> |
| 7 | <b>Organization of consultations/ long term follow-up visits</b>                                                       | <p>1. I haven't changed the organization of follow-up visits</p> <p>2. Long term follow-up suspended 3. long term follow-up suspended but urgent referral accepted (limited number) and distanced in waiting room</p> <p>3. Long term follow-up suspended but urgent referral accepted no special measures in waiting room</p>                                                                                                                                                                                                                                                                                                                                                                                            |
|   | <b>Theater List</b>                                                                                                    | <p>1. Unchanged</p> <p>2. Reduced sessions</p> <p>3. Emergency only</p>                                                                                                                                                                                                                                                                                                                                                                                                                                                                                                                                                                                                                                                   |

**Table 3. Web-based poll variables. Grouping of variables for statistical analysis**

**Pandemic Phase According to "Covid 19 Elective Case Triage Guidelines for Surgical Care Breast Cancer Surgery"**  
<https://www.facs.org/covid-19/clinical-guidance/elective-case/breast-cancer>.: Phase 1 – Standard (1); Phase 2 + 3 – Restrictions (2);

**Priorities (cases to be done as soon as possible):** Neoadjuvant patients finishing treatment; T2 or N1 HR+/HER2 neg; Triple negative or HER2 positive ; Discordant biopsies likely to be malignant Excision of malignant recurrence – Standard (1); Like the previous but no Discordant biopsies likely to be malignant + Neoadjuvant patients finishing treatment; Triple negative or HER2 positive patients + Neoadjuvant patients finishing treatment – Restrictions (2);

**Cases that can be deferred:** I'm not changing my practice – Standard (1); I'm deferring bilateral procedures and autologous reconstructions and benign cases + Like the previous but also ER positive DCIS + Like the previous but also Re-excision surgery – Restrictions (2);

**Alternative treatment approaches to be considered including use primary systemic therapies (chemo and hormonal):** I'm not changing indications for primary systemic therapies – Standard (1); T1N0 HR+/Her2 neg; tumors can receive hormonal therapy; Triple negative and HER2 positive tumors can undergo neoadjuvant therapy prior to surgery; some T2 or N1 HR+/HER2 negative tumors can receive hormonal therapy; N1 irrespective of subtype can undergo neoadjuvant therapy + Triple negative and HER2 positive tumors can undergo neoadjuvant therapy prior to surgery; N1 irrespective of subtype can undergo neoadjuvant therapy prior to surgery + Triple negative and HER2 positive tumors can undergo neoadjuvant therapy prior to surgery. I use endocrine treatment in elderly patients with comorbidities – Restrictions (2);

**Organization of consultations/ long term follow-up visits:** I' haven't changed the organization of follow-up visits – Standard (1); long term follow-up suspended + long term follow-up suspended but urgent referral accepted (limited number) and distanced in waiting room + long term follow-up suspended but urgent referral accepted no special measures in waiting room – Restrictions (2);

**Theater List:** Unchanged – Standard (1); Reduced sessions + Emergency Only – Restrictions (2)
